# Supplementary material
Source: publisher figshare collection journal article supplement (https://frontiersin.figshare.com/ndownloader/files/25261352)
Supplement: Supplementary file [file 25261352]

Table S1

| T cell clone     | cy0736 blcl | cy0742 blcl | cy0743 blcl | cy0746 blcl | cy0747 blcl | no blcl  | cy0870 blcl | cy0872 blcl | cy0874 blcl | cy0878 blcl | cy0739 blcl | no blcl   |             |
|------------------|-------------|-------------|-------------|-------------|-------------|----------|-------------|-------------|-------------|-------------|-------------|-----------|-------------|
| cy0737 C1        | 14          | 38          | 5           | 0           | NT          | 0        | NT          | NT          | NT          | NT          | NT          | NT        |             |
| cy0737 C2        | 410         | 317         | 355         | 249         | 285         | 1        | 6           | 16          | 20          | 69          | 65          | 1         |             |
| cy0737 C3        | 2           | 29          | 5           | 3           | NT          | 0        | NT          | NT          | NT          | NT          | NT          | NT        |             |
| cy0737 C4        | 18          | 58          | 154         | 227         | 83          | 16       | 3           | 2           | 94          | 39          | 117         | 2         |             |
| cy0737 C5        | 11          | 63          | 7           | 0           | NT          | 0        | NT          | NT          | NT          | NT          | NT          | NT        |             |
| cy0737 C6        | 247         | 426         | 254         | 328         | 185         | 10       | 125         | 299         | 375         | 135         | 419         | 13        |             |
| <b>cy0737 C7</b> | <b>12</b>   | <b>44</b>   | <b>17</b>   | <b>2</b>    | <b>NT</b>   | <b>2</b> | <b>208</b>  | <b>89</b>   | <b>387</b>  | <b>131</b>  | <b>140</b>  | <b>74</b> | <b>IGHM</b> |
| cy0737 C8        | 45          | 83          | 198         | 22          | 16          | 20       | NT          | NT          | NT          | NT          | NT          | NT        |             |
| cy0737 D2        | 133         | 401         | 310         | 46          | 322         | 31       | 11          | 10          | 22          | 103         | 77          | 0         |             |
| cy0737 D3        | 258         | 223         | 38          | 24          | 19          | 22       | 12          | 6           | 24          | 74          | 74          | 0         |             |
| cy0737 D4        | 532         | 216         | 12          | 8           | 289         | 4        | 6           | 8           | 11          | 79          | 78          | 0         |             |
| cy0737 D5        | 52          | 92          | 228         | 254         | 138         | 4        | 5           | 7           | 14          | 50          | 66          | 0         |             |
| cy0737 D6        | 96          | 21          | 31          | 30          | 58          | 37       | 9           | 3           | 8           | 62          | 84          | 0         |             |
| cy0737 D7        | 28          | 537         | 20          | 362         | 42          | 13       | 17          | 23          | 30          | 76          | 51          | 11        |             |
| cy0737 D8        | 265         | 486         | 360         | 390         | 349         | 1        | 13          | 3           | 69          | 77          | 110         | 0         |             |
| cy0737 E1        | 32          | 142         | 221         | 14          | 51          | 8        | 11          | 8           | 17          | 68          | 86          | 0         |             |
| cy0737 E2        | 202         | 440         | 386         | 358         | 355         | 3        | NT          | NT          | NT          | NT          | NT          | NT        |             |
| cy0737 E3        | 101         | 368         | 136         | 14          | 199         | 3        | 9           | 10          | 23          | 66          | 86          | 0         |             |
| cy0737 E4        | 129         | 116         | TNTC        | TNTC        | 276         | 171      | 10          | 6           | 24          | 94          | 105         | 1         |             |
| cy0737 E5        | 41          | 166         | 100         | 17          | 52          | 4        | NT          | NT          | NT          | NT          | NT          | NT        |             |
| cy0737 E6        | NT          | NT          | NT          | NT          | NT          | NT       | 10          | 12          | 21          | 81          | 99          | 0         |             |
| cy0737 E7        | NT          | NT          | NT          | NT          | NT          | NT       | 217         | 31          | 56          | 73          | 69          | 19        |             |

  

|                  | cy0736 blcl | cy0742 blcl | cy0743 blcl | cy0746 blcl | cy0747 blcl | no blcl  | cy0870 blcl | cy0872 blcl | cy0874 blcl | cy0878 blcl | cy0739 blcl | no blcl  |              |
|------------------|-------------|-------------|-------------|-------------|-------------|----------|-------------|-------------|-------------|-------------|-------------|----------|--------------|
| cy0738 C1        | 8           | 73          | 7           | 8           | NT          | 0        | 17          | 230         | 269         | 48          | 67          | 11       |              |
| cy0738 C2        | 20          | 226         | 10          | 233         | 26          | 3        | 14          | 128         | 166         | 58          | 58          | 2        |              |
| cy0738 C3        | 234         | 422         | 349         | 367         | 287         | 3        | 17          | 9           | 17          | 101         | 94          | 0        |              |
| cy0738 C4        | 119         | 358         | 244         | 241         | 208         | 1        | 12          | 13          | 31          | 94          | 101         | 0        |              |
| cy0738 C7        | 442         | 539         | 490         | 568         | 313         | 5        | 16          | 9           | 22          | 77          | 90          | 0        |              |
| cy0738 C8        | 158         | 361         | 212         | 162         | 102         | 71       | NT          | NT          | NT          | NT          | NT          | NT       |              |
| <b>cy0738 D1</b> | <b>96</b>   | <b>585</b>  | <b>514</b>  | <b>492</b>  | <b>337</b>  | <b>4</b> | <b>64</b>   | <b>9</b>    | <b>206</b>  | <b>104</b>  | <b>171</b>  | <b>2</b> | <b>OR4K3</b> |
| cy0738 D2        | 28          | 363         | 37          | 565         | 33          | 26       | 11          | 48          | 120         | 44          | 54          | 2        |              |
| cy0738 D3        | 510         | 655         | 13          | 579         | 42          | 5        | 8           | 5           | 45          | 64          | 95          | 0        |              |
| cy0738 D4        | 235         | 399         | 26          | 211         | 44          | 4        | 18          | 10          | 10          | 75          | 88          | 0        |              |
| cy0738 D5        | 32          | 69          | 9           | 11          | NT          | 2        | 39          | 35          | 74          | 180         | 97          | 36       |              |
| cy0738 D7        | 386         | 680         | 641         | 464         | 429         | 2        | 19          | 9           | 9           | 81          | 116         | 1        |              |
| cy0738 D8        | 56          | 162         | 499         | 49          | 84          | 38       | 296         | 13          | 395         | 76          | 99          | 2        |              |
| cy0738 E1        | 438         | 166         | 571         | 570         | 501         | 24       | 9           | 10          | 18          | 81          | 81          | 0        |              |

|           |     |     |     |     |     |   |    |    |    |     |     |   |
|-----------|-----|-----|-----|-----|-----|---|----|----|----|-----|-----|---|
| cy0738 E2 | 346 | 423 | 15  | 345 | 35  | 3 | 17 | 11 | 13 | 107 | 99  | 0 |
| cy0738 E3 | 206 | 326 | 17  | 173 | 38  | 3 | 9  | 12 | 20 | 77  | 83  | 0 |
| cy0738 E4 | 469 | 474 | 431 | 579 | 475 | 2 | 14 | 7  | 29 | 133 | 117 | 0 |

|                  | cy0736 blcl | cy0742 blcl | cy0743 blcl | cy0746 blcl | cy0747 blcl | no blcl   | cy0870 blcl | cy0872 blcl | cy0874 blcl | cy0878 blcl | cy0739 blcl | no blcl   |                         |
|------------------|-------------|-------------|-------------|-------------|-------------|-----------|-------------|-------------|-------------|-------------|-------------|-----------|-------------------------|
| cy0741 C1        | 49          | 51          | 13          | 21          | NT          | 23        | 259         | 251         | 323         | 196         | 205         | 158       |                         |
| cy0741 C2        | 183         | 136         | 3           | 0           | NT          | 0         | 191         | 6           | 24          | 81          | 99          | 1         |                         |
| cy0741 C3        | 8           | 101         | 6           | 41          | NT          | 3         | 3           | 10          | 10          | 7           | 6           | 3         |                         |
| cy0741 C4        | 12          | 213         | 4           | 122         | NT          | 1         | 11          | 111         | 110         | 16          | 19          | 7         |                         |
| cy0741 C5        | 13          | 50          | 18          | 342         | 21          | 18        | 8           | 8           | 7           | 45          | 70          | 0         |                         |
| cy0741 C6        | 104         | 353         | 37          | 26          | 239         | 22        | 15          | 7           | 22          | 74          | 97          | 0         |                         |
| cy0741 C7        | 312         | 291         | 3           | 1           | NT          | 2         | 11          | 6           | 17          | 39          | 61          | 2         |                         |
| <b>cy0741 C8</b> | <b>43</b>   | <b>76</b>   | <b>461</b>  | <b>54</b>   | <b>75</b>   | <b>61</b> | <b>14</b>   | <b>4</b>    | <b>24</b>   | <b>357</b>  | <b>78</b>   | <b>0</b>  | <b>Apobec3C</b>         |
| cy0741 D1        | 375         | 602         | 407         | 428         | 360         | 5         | 9           | 7           | 20          | 63          | 79          | 0         |                         |
| cy0741 D2        | 165         | 788         | 207         | 833         | 236         | 203       | 143         | 393         | 448         | 156         | 104         | 87        |                         |
| cy0741 D3        | 55          | 152         | 787         | 33          | 70          | 34        | 354         | 351         | 59          | 110         | 72          | 38        |                         |
| cy0741 D4        | 161         | 342         | 25          | 184         | 137         | 25        | 17          | 6           | 13          | 71          | 106         | 0         |                         |
| cy0741 D5        | 402         | 285         | 511         | 400         | 15          | 4         | 6           | 11          | 24          | 95          | 78          | 0         |                         |
| cy0741 D6        | 597         | 621         | 78          | 35          | 99          | 32        | NT          | NT          | NT          | NT          | NT          | NT        |                         |
| cy0741 D7        | 28          | 435         | 301         | 150         | 250         | 4         | 11          | 12          | 19          | 76          | 98          | 0         |                         |
| cy0741 D8        | NT          | NT          | NT          | NT          | NT          | NT        | 13          | 7           | 27          | 98          | 99          | 0         |                         |
|                  | cy0736 blcl | cy0742 blcl | cy0743 blcl | cy0746 blcl | cy0747 blcl | no blcl   | cy0870 blcl | cy0872 blcl | cy0874 blcl | cy0878 blcl | cy0739 blcl | no blcl   |                         |
| cy0747 C1        | 186         | 398         | 227         | 180         | 33          | 0         | 8           | 5           | 10          | 57          | 82          | 0         |                         |
| cy0747 C2        | 36          | 76          | 8           | 23          | NT          | 0         | 1           | 4           | 9           | 78          | 66          | 2         |                         |
| cy0747 C3        | 14          | 226         | 3           | 0           | NT          | 0         | NT          | NT          | NT          | NT          | NT          | NT        |                         |
| cy0747 C4        | 10          | 53          | 8           | 3           | NT          | 0         | 17          | 5           | 7           | 41          | 89          | 0         |                         |
| cy0747 C5        | 7           | 336         | 180         | 301         | 14          | 12        | 11          | 8           | 8           | 62          | 93          | 0         |                         |
| cy0747 C6        | 14          | 489         | 323         | 359         | 12          | 4         | 163         | 142         | 166         | 68          | 211         | 1         |                         |
| cy0747 C7        | 326         | 698         | 448         | 374         | 30          | 3         | 43          | 102         | 123         | 115         | 224         | 0         |                         |
| cy0747 C8        | 774         | 69          | 4           | 891         | 12          | 11        | 8           | 582         | 493         | 567         | 65          | 0         |                         |
| cy0747 D1        | 106         | 666         | 228         | 666         | 28          | 6         | 0           | 1           | 4           | 10          | 4           | 0         |                         |
| cy0747 D2        | 88          | 102         | 3           | 1           | NT          | 0         | 9           | 0           | 8           | 56          | 76          | 0         |                         |
| cy0747 D3        | 719         | 848         | 13          | 5           | 36          | 4         | 14          | 4           | 18          | 76          | 88          | 0         |                         |
| cy0747 D4        | 739         | 853         | 22          | 675         | 30          | 4         | 15          | 10          | 14          | 55          | 83          | 0         |                         |
| <b>cy0747 D5</b> | <b>16</b>   | <b>623</b>  | <b>516</b>  | <b>606</b>  | <b>47</b>   | <b>16</b> | <b>82</b>   | <b>172</b>  | <b>208</b>  | <b>65</b>   | <b>116</b>  | <b>10</b> | <b>IL20RA or MAP3K5</b> |
| cy0747 D6        | NT          | NT          | NT          | NT          | NT          | NT        | 132         | 176         | 188         | 63          | 193         | 0         |                         |

TNTC: Too numerous to count

NT: Not tested
